# Supplementary material
Source: MDPI journal article supplement (https://www.mdpi.com/2075-4701/7/4/151)
Supplement: s1 [file s1]

**Reduced fracture toughness of a metallic glass at cryogenic temperature**

**Yihao Zhou, Jiaxin Liu, Dongxue Han, Xiangru Chen*, Gang Wang, Qijie Zhai**


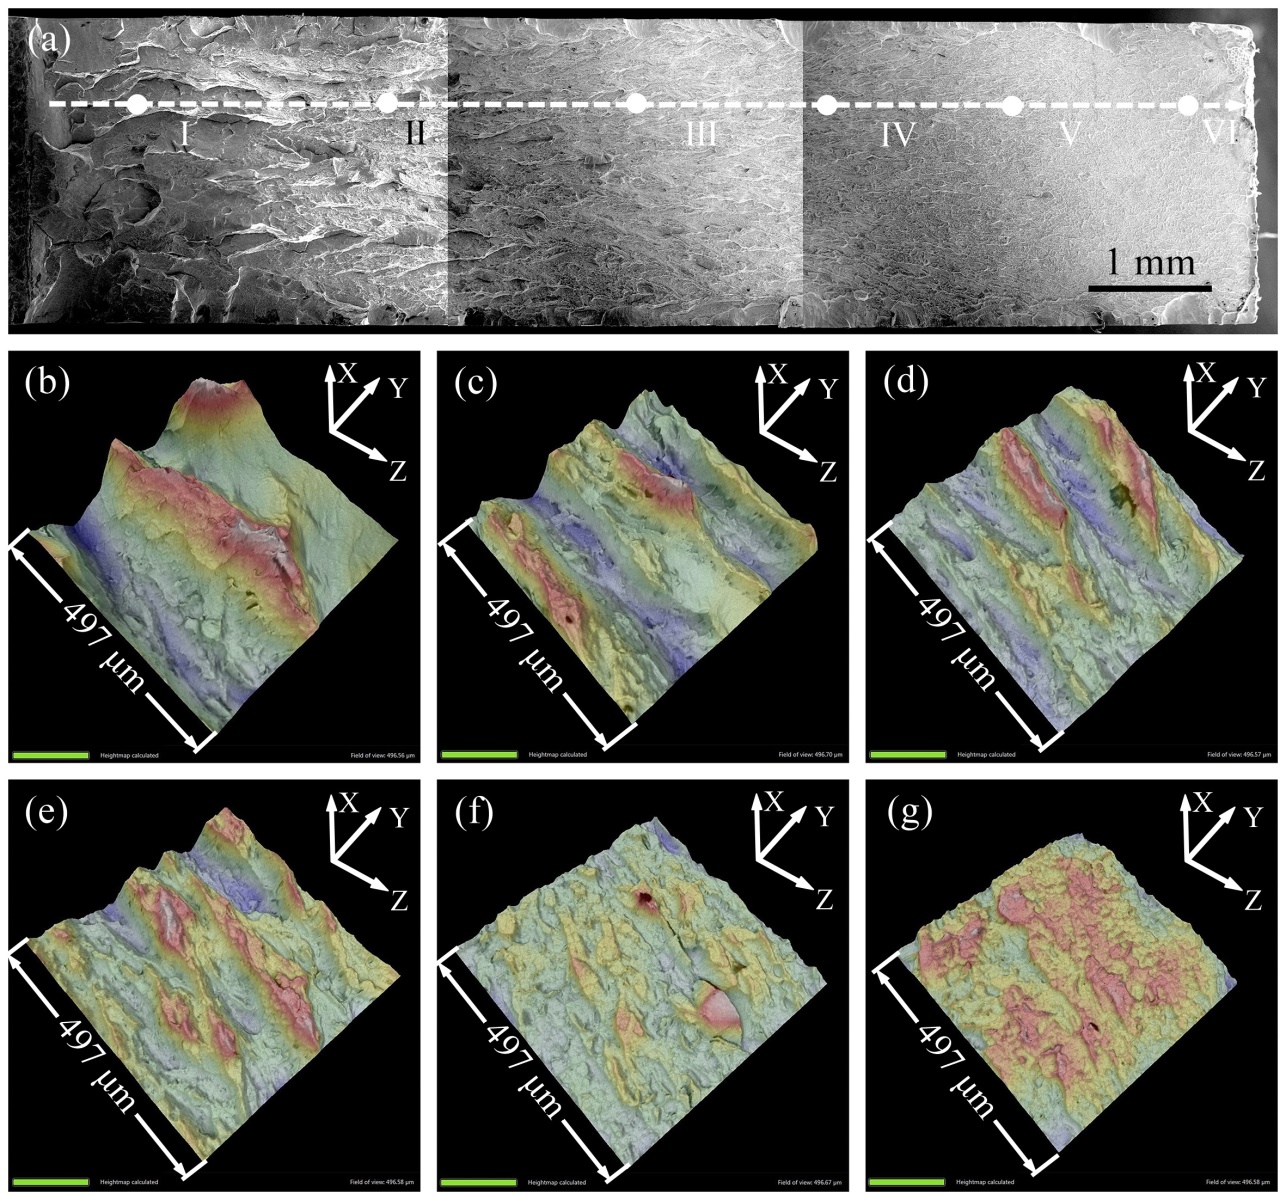


**Figure S1.** Fractographic evolution for the specimen tested at room temperature with notch toughness value of 102 MPa m0.5. (a) overview ( arrow indicates the crack propagation direction ); (b)-(g) are 3D fractographies at point Ⅰ, Ⅱ, Ⅲ, Ⅳ, Ⅴ and Ⅵ in (a), respectively.

**
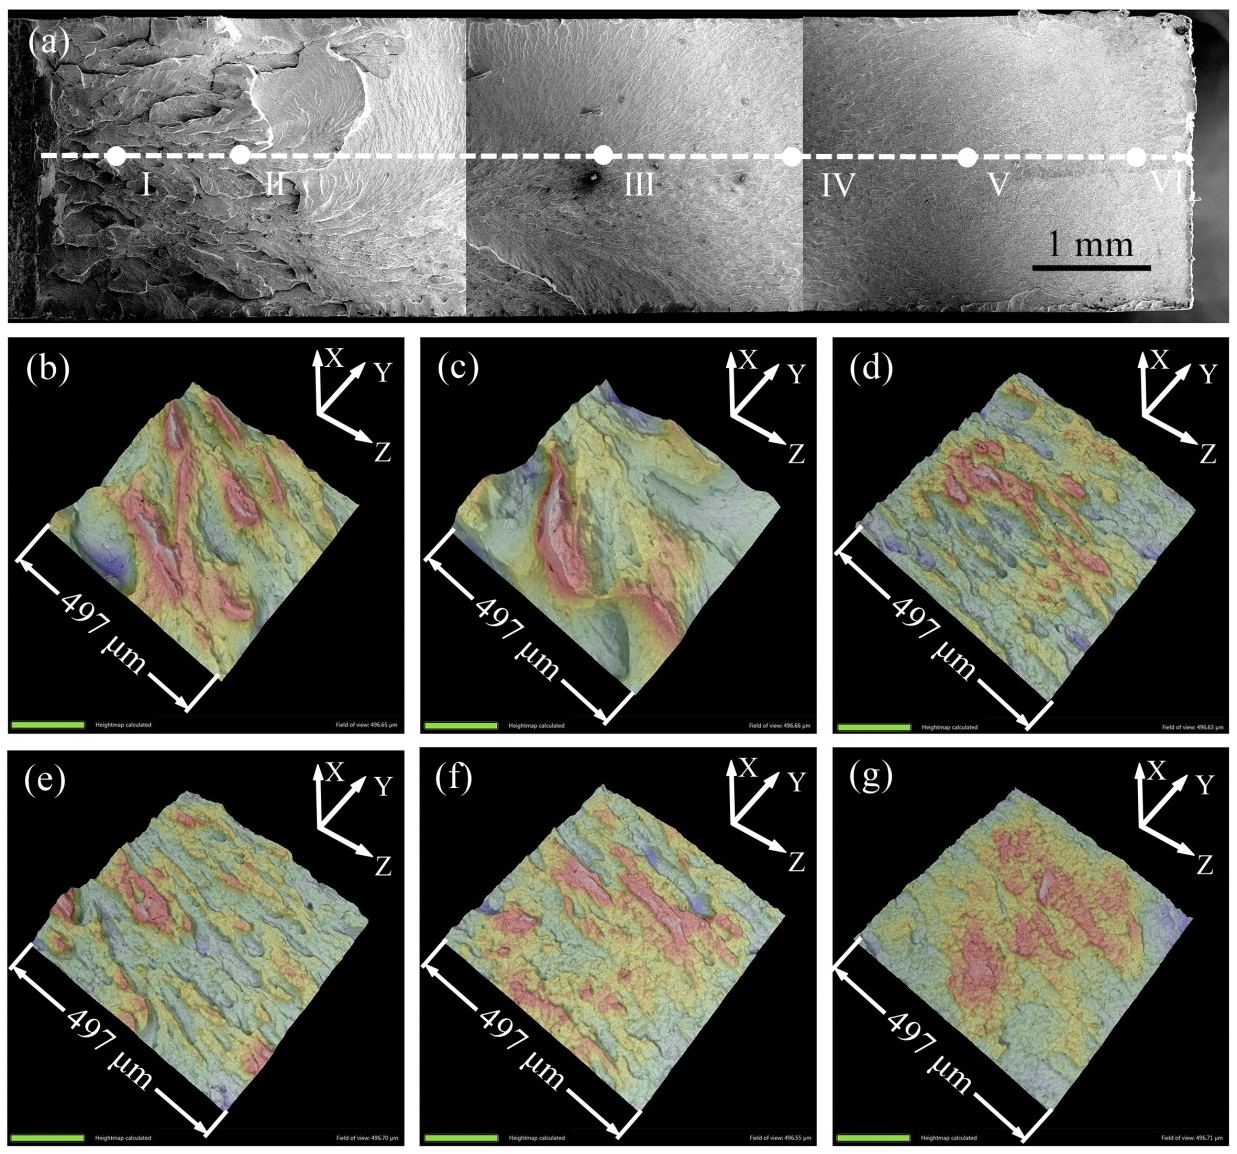
**

**Figure S2.** Fractographic evolution for the specimen tested at 213 K with notch toughness value of 79 MPa m0.5. (a) overview ( arrow indicates the crack propagation direction ); (b)-(g) are 3D fractographies at point Ⅰ, Ⅱ, Ⅲ, Ⅳ, Ⅴ and Ⅵ in (a), respectively.

**
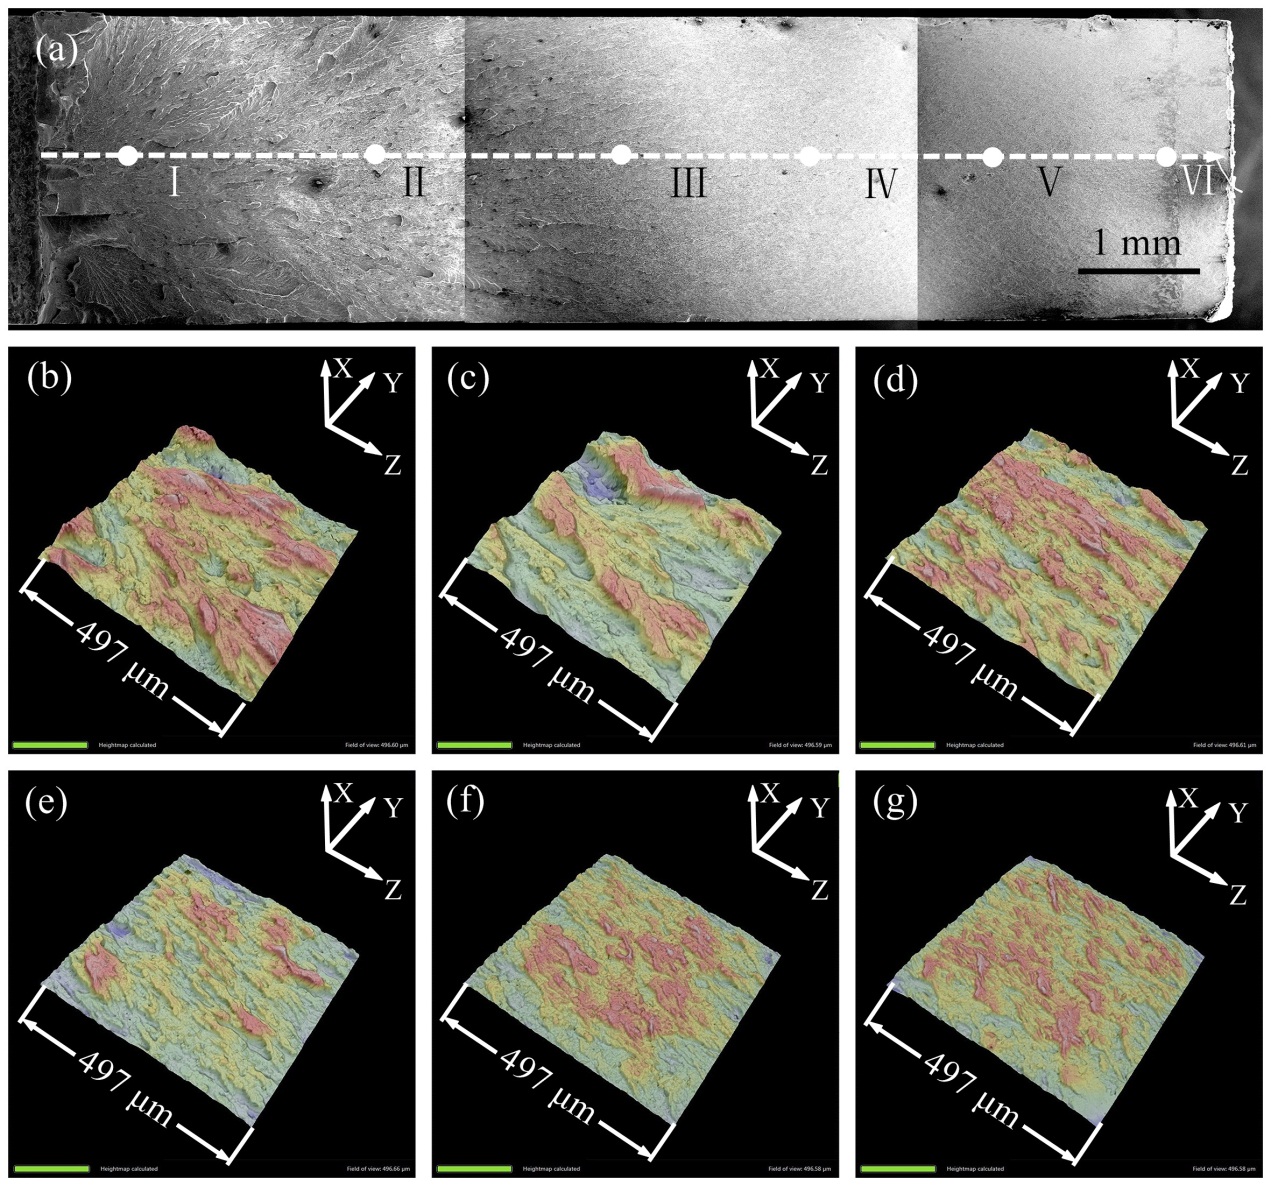
**

**Figure S3.** Fractographic evolution for the specimen tested at 183 K with notch toughness value of 53 MPa m0.5. (a) overview ( arrow indicates the crack propagation direction ); (b)-(g) are 3D fractographies at point Ⅰ, Ⅱ, Ⅲ, Ⅳ, Ⅴ and Ⅵ in (a), respectively

**
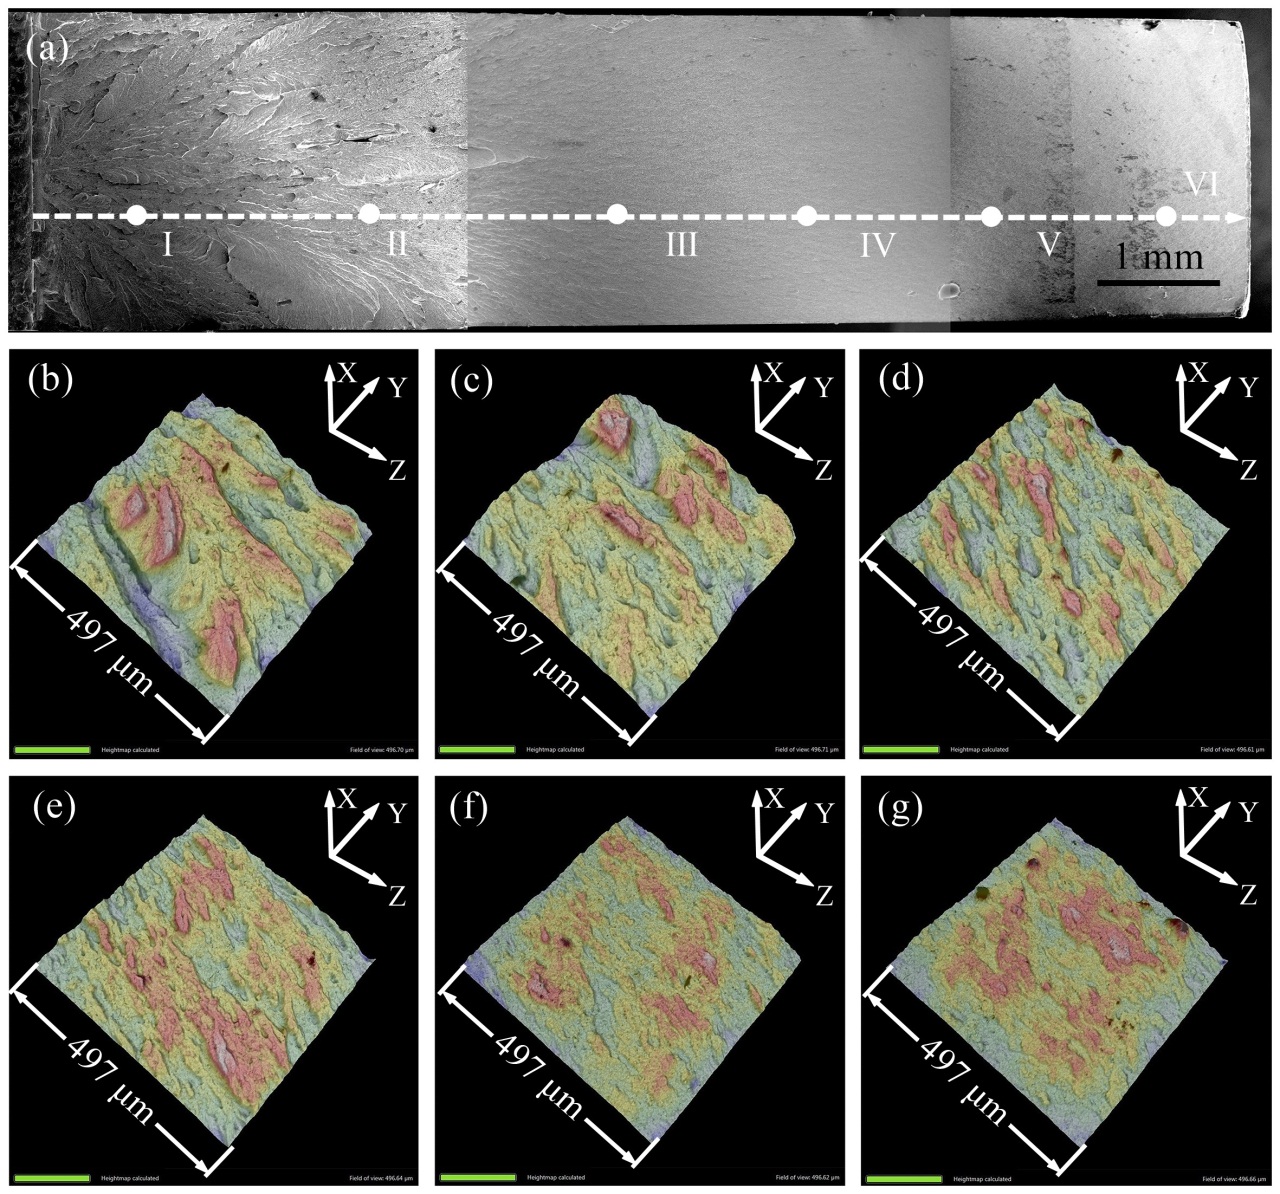
**

**Figure S4.** Fractographic evolution for the specimen tested at 153 K with notch toughness value of 59 MPa m0.5. (a) overview ( arrow indicates the crack propagation direction ); (b)-(g) are 3D fractographies at point Ⅰ, Ⅱ, Ⅲ, Ⅳ, Ⅴ and Ⅵ in (a), respectively

**
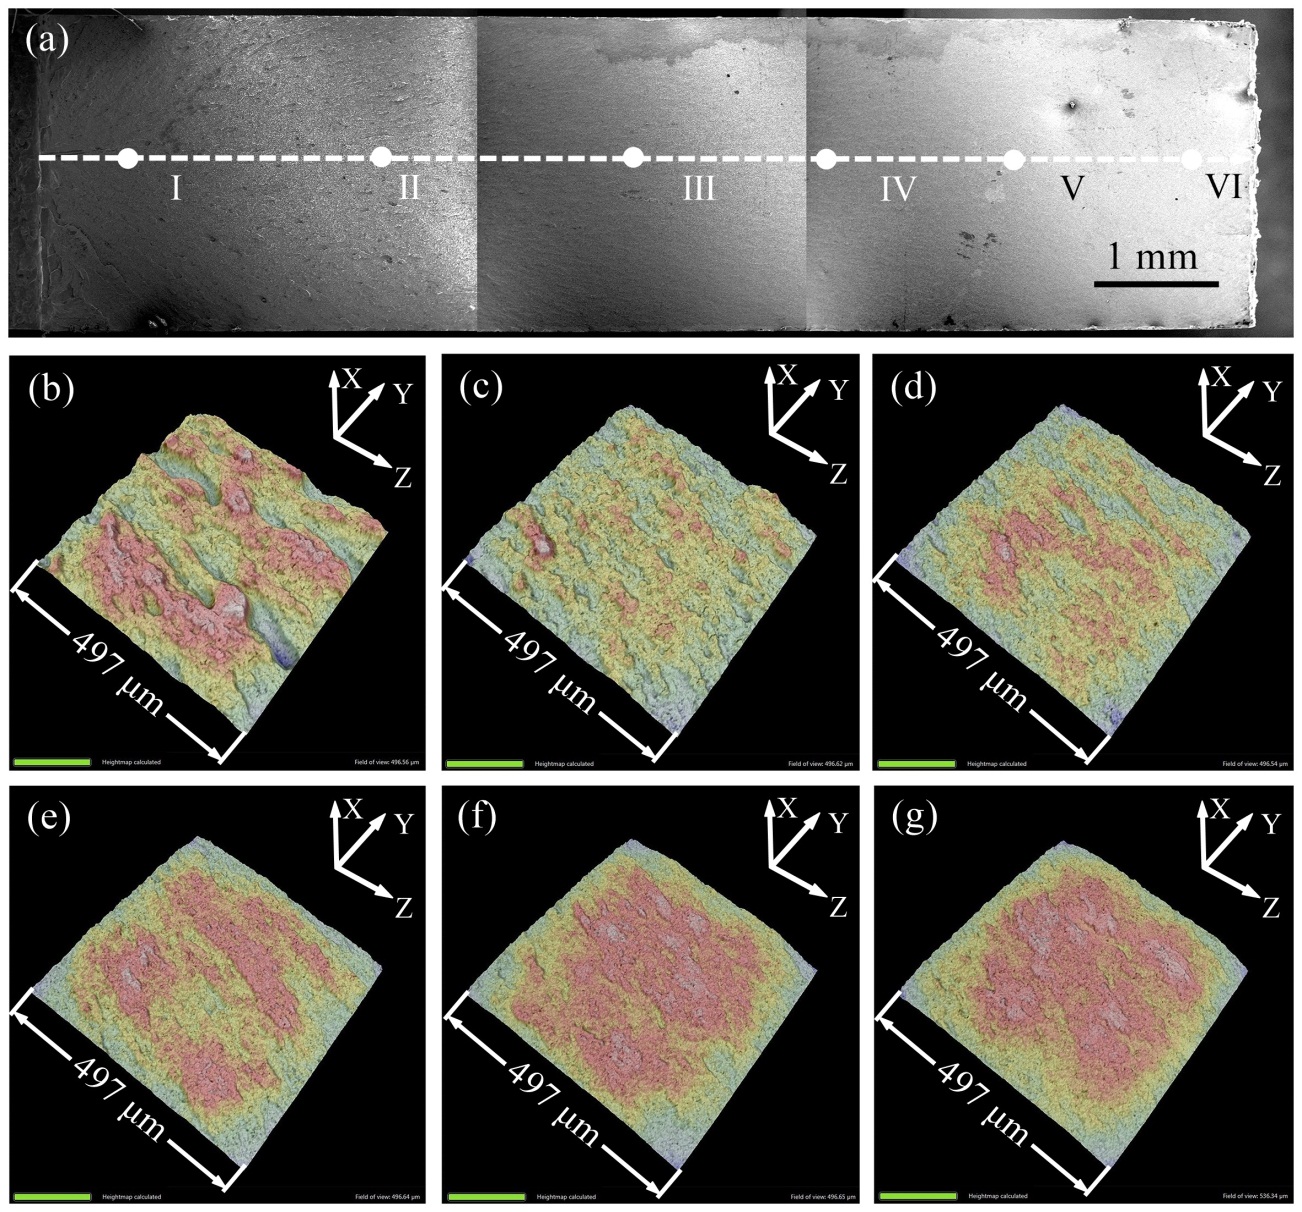
**

**Figure S5.** Fractographic evolution for the specimen tested at 123 K with notch toughness value of 47 MPa m0.5. (a) overview ( arrow indicates the crack propagation direction ); (b)-(g) are 3D fractographies at point Ⅰ, Ⅱ, Ⅲ, Ⅳ, Ⅴ and Ⅵ in (a), respectively.
